# Supplementary material for: EMU: reconfigurable graphical user interfaces for Micro-Manager
Source: PubMed Central journal article supplement (PMC7559757; doi:10.1186/s12859-020-03727-8), 2020-10-15

*ConfigurableFrame*

```

+getConfigurablePanels() : ArrayList<ConfigurablePanel>
+getDefaultPluginSettings() : HashMap<String,Setting>
+getCurrentPluginSettings() : HashMap<String, Setting>
+getUIProperties() : HashMap<String, UIProperty>
+getUIParameters() : HashMap<String, UIParameter>

```

javax.swing.JFrame

javax.swing.JPanel

*ConfigurableMainFrame*

```

-panels_ : ArrayList<ConfigurablePanel>
-pluginSettings_ : HashMap<String,Setting>
-properties_ : HashMap<String, UIProperty>
-parameters_ : HashMap<String, UIParameter>

+updateAllConfigurablePanels()
+updateAllProperties()
+addAllListeners()
+updateMenu()
+shutDown()

#getCore() : mmcorej.CMMCore
#getController() : SystemController

#initComponents()
#getPluginInfo() : String

```

*ConfigurablePanel*

```

-label_ : String
-properties_ : HashMap<String, UIProperty>
-parameters_ : HashMap<String, UIParameter>
-internalprops_ : HashMap<String, InternalProperty>

+getPanelLabel() : String
+substituteParameter(UIParameter)
+substituteInternalProperty(InternalProperty)
+triggerPropertyHasChanged(String, String)
+triggerParameterHasChanged(String)
+setUIPropertyValue(String, String)
+setUIPropertyValueByState(String, String)
+setUIPropertyValueByStateIndex(String, int)

#addUIProperty(UIProperty)
#getUIPropertyValue(String) : String
#updateAllProperties()
#getUIProperties() : HashMap<String, UIProperty>
#getUIProperty(String) : UIProperty
#getUIPropertyType(String) : UIPropertyType
#setUIPropertyFriendlyName(String, String)

#addUIParameter(UIParameter)
#updateAllParameters()
#getUIParameters() : HashMap<String, UIParameter>
#getUIParameter(String) : UIParameter
#getUIParameterType(String) : UIParameterType
#getBoolUIParameterValue(String) : boolean
#getColorUIParameterValue(String) : java.awt.Color
#getDoubleUIParameterValue(String) : double
#getIntegerUIParameterValue(String) : int
#getStringUIParameterValue(String) : String

#addInternalProperty(InternalProperty)
#getInternalProperties() : HashMap<String, InternalProperty>
#getInternalProperty(String) : InternalProperty
#getInternalPropertyType(String) : InternalPropertyType
#setInternalPropertyValue(String, boolean)
#setInternalPropertyValue(String, double)
#setInternalPropertyValue(String, int)
#getBoolInternalPropertyValue(String) : boolean
#getDoubleInternalPropertyValue(String) : double
#getIntegerInternalPropertyValue(String) : int

#initializeProperties()
#propertyhasChanged(String, String)
#addComponentListeners()
#initializeParameters()
#parameterhaschanged(String)
#initializeInternalProperties()
#internalpropertyhasChanged(String)
#getDescription() : String
#shutDown()

```

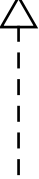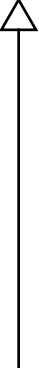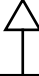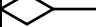

Supplement: 12859_2020_3727_MOESM1_ESM.pdf [file 12859_2020_3727_MOESM1_ESM.pdf]
