# Supplementary material for: EMU: reconfigurable graphical user interfaces for Micro-Manager
Source: PubMed Central journal article supplement (PMC7559757; doi:10.1186/s12859-020-03727-8), 2020-10-15

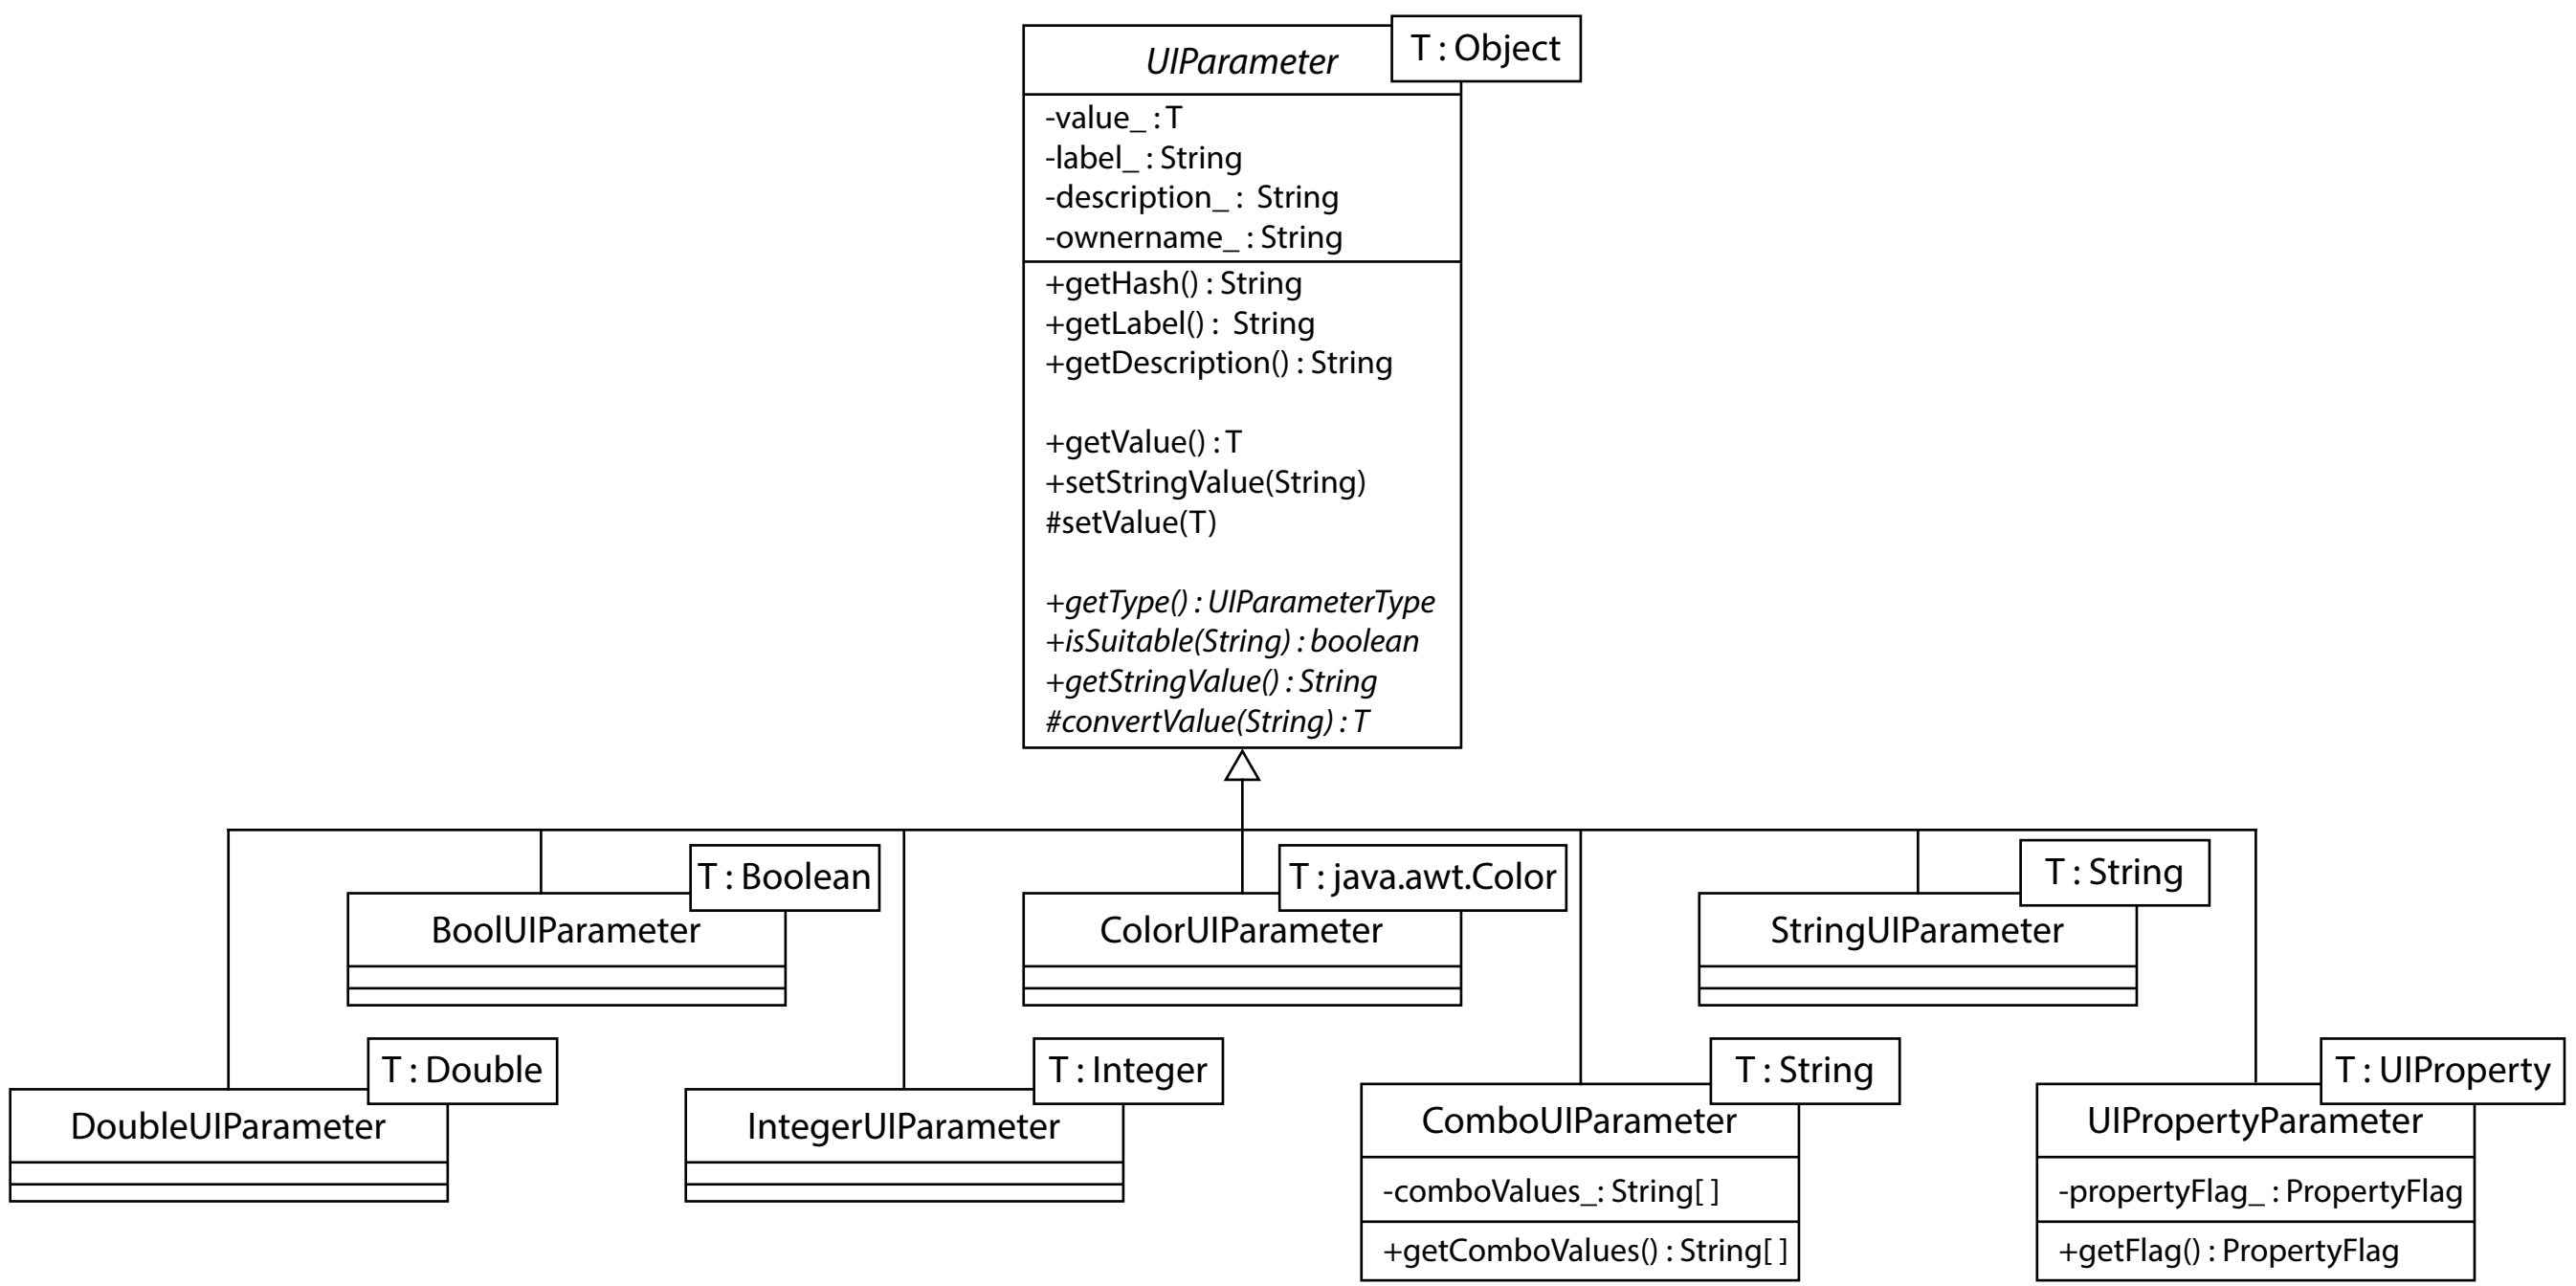

Supplement: 12859_2020_3727_MOESM3_ESM.pdf [file 12859_2020_3727_MOESM3_ESM.pdf]
